# Supplementary material
Source: PubMed Central journal article supplement (PMC2878719)
Supplement: NIHMS192499-supplement-01.pdf [file NIHMS192499-supplement-01.pdf]

## Supplementary Tables

**Table S1**

### Primers used for Mutagenesis

| Gene     | Region | Primer Type | Sequence                                                                   |
|----------|--------|-------------|----------------------------------------------------------------------------|
| Apobec3G | 1      | Mutagenic   | 5'-<br>AGGAAGTTTCTTTACCAATTCAAAAATGAACCATGGGTCAGAGGACGGCATG<br>AGACCTACCTG |
|          |        | Reverse     | CAGGTAGGTCTCATGCCGTCCTCTGACCCATGGTTCATTTTTGAATTGGTAAA<br>GAAACTTCCT        |
|          | 2      | Mutagenic   | ATCTTCACCGCGGCATCTATGATGATCAAGGAAGAGCTCAGGAGGGGCTGC<br>GGCGG               |
|          |        | Reverse     | CCGCCGAGCCCCTCTGAGCTCTTCCTTGATCATCATAGATGCGCGCGGTGA<br>AGAT                |
| AID      | 1      | Mutagenic   | ACTTCAACTTTAACAATGTCCGCTGGGCTAAGGGTCGGCGTGAGACTTACCT<br>GTG                |
|          |        | Reverse     | CACAGGTAAGTCTCACGCCGACCCCTAGCCCAGCGGACATTGTTAAAGTTGA<br>AAGT               |
|          | 2      | Mutagenic   | ATCAAGACTCTCTACTTCTGTGAGGACCGCAAGGCTGAGCCCGAGGGGCTGC<br>GCACC              |
|          |        | Reverse     | GGTGCGCAGCCCCTCGGGCTCAGCCTTGCGGTCTCACAGAAGTAGAGAGTC<br>TTGAT               |

Sequences of primers used to introduce APOBEC3G regions 1 and 2 into AID gene, and to introduce corresponding AID regions into Apobec3G gene are shown.

**Table S2**  
**DNA oligomers used for Deamination Assay**

| <b>Name</b> | <b>Sequence</b>      |
|-------------|----------------------|
| CCC-17      | 5'-ATTATTACCCATTTATT |
| UCC-17      | 5'-ATTATTAUCCATTTATT |
| CUC-17      | 5'-ATTATTACUCATTTATT |
| CCU-17      | 5'-ATTATTACCUATTTATT |

Table S3

Frequency of Papillation promoted by AID Hybrids

| <b>Vector</b> | <b>AID</b> | <b>AID-A3GR1</b> | <b>AID-A3GR2</b> | <b>AID-A3GR1R2</b> | <b>A3G</b> |
|---------------|------------|------------------|------------------|--------------------|------------|
| 0.000         | 0.029      | 0.007            | 0.074            | 0.063              | 1.000      |
| 0.002         | 0.012      | 0.003            | 0.051            | 0.046              | 0.981      |
| 0.000         | 0.010      | 0.003            | 0.061            | 0.044              | 0.986      |
| 0.004         | 0.011      | 0.002            | 0.021            |                    | 1.000      |
| 0.009         | 0.026      | 0.024            | 0.042            |                    | 1.000      |

Ratio of number of cells with Lac<sup>+</sup> papillae to total number of cells. The numbers are from independent experiments.

Table S4

Frequency of Papillation promoted by A3G Hybrids

| <b>Vector</b> | <b>A3G</b> | <b>A3G-AIDR1</b> | <b>A3G-AIDR2</b> | <b>A3G-AIDR1R2</b> | <b>AID</b> |
|---------------|------------|------------------|------------------|--------------------|------------|
| 0.000         | 1.000      | 1.000            | 0.013            | 0.111              | 0.029      |
| 0.002         | 0.981      | 0.999            | 0.016            | 0.120              | 0.012      |
| 0.000         | 0.986      | 1.000            | 0.010            | 0.045              | 0.010      |
| 0.004         | 1.000      |                  |                  | 0.053              | 0.011      |
| 0.009         | 1.000      |                  |                  |                    | 0.026      |

Ratio of number of cells with Lac<sup>+</sup> papillae to total number of cells. The numbers are from independent experiments.

|                  |      |             |  |
|------------------|------|-------------|--|
|                  |      | Gly         |  |
| Lac <sup>-</sup> | 5' - | AAT GGG TCA |  |
|                  |      | TTA CCC AGT |  |
|                  |      | ↓           |  |
| Lac <sup>+</sup> | 5' - | AAT GAG TCA |  |
|                  |      | TTA CTC AGT |  |
|                  |      | Glu         |  |

Supplementary Fig. S1: Sequence of the *lacZ* gene around codon 461 in CC102 and in its wild-type parent are shown. The G:C to A:T change needed to revert the allele is colored red.

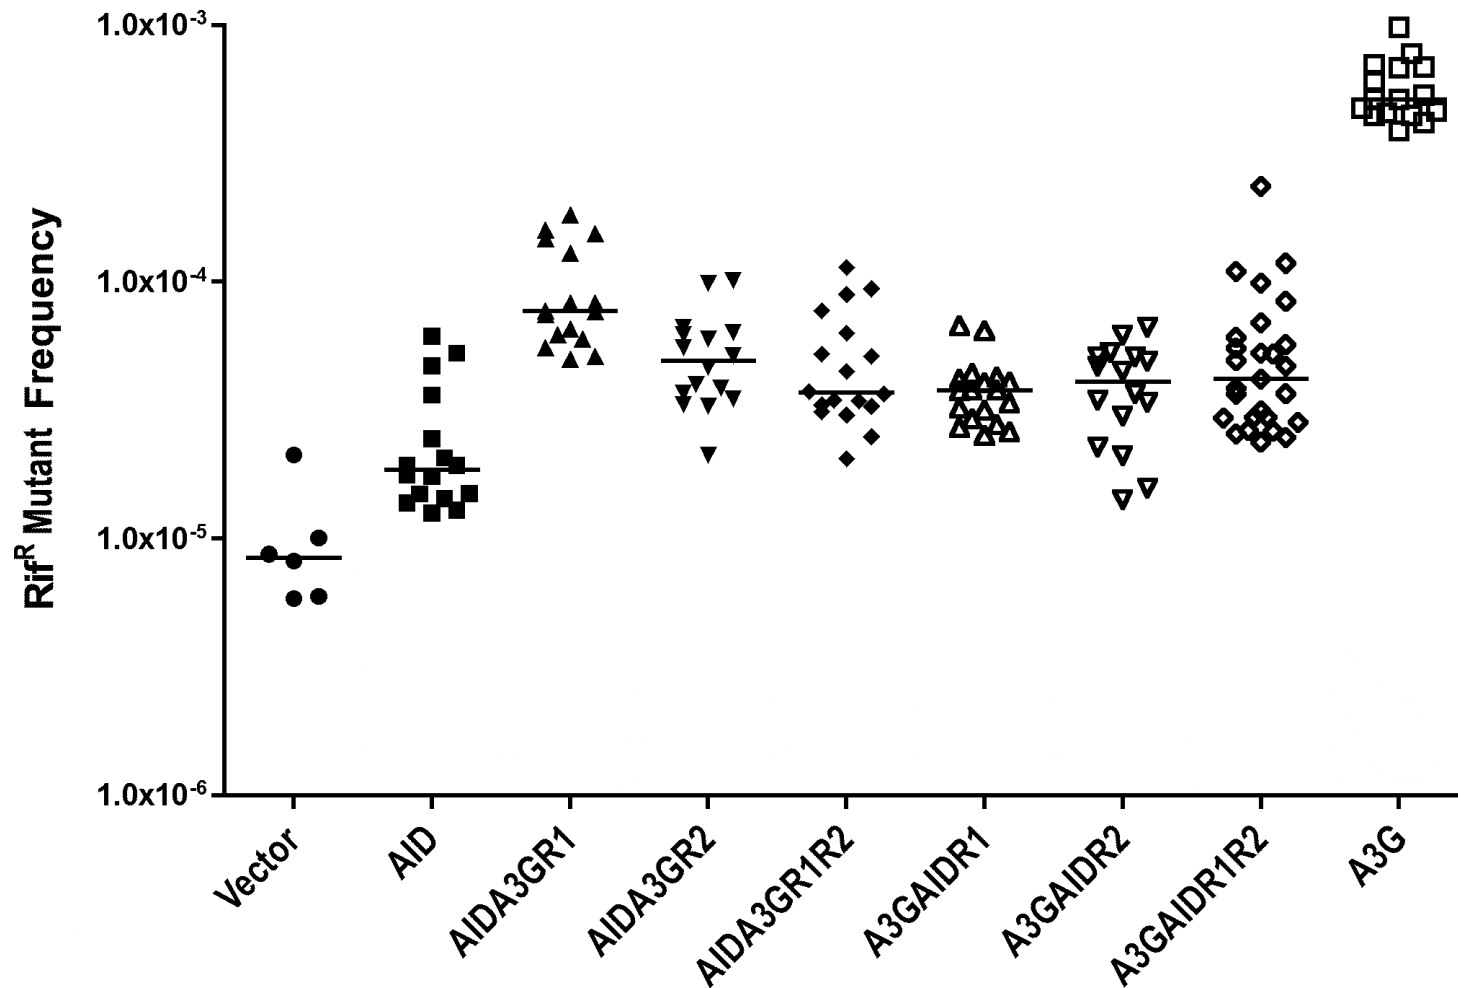

Supplementary Fig. S2: Frequency of rifampicin-resistant mutants in cells expressing AID/A3G hybrids. Median values are shown by a horizontal line.

### Supplementary Figure S3

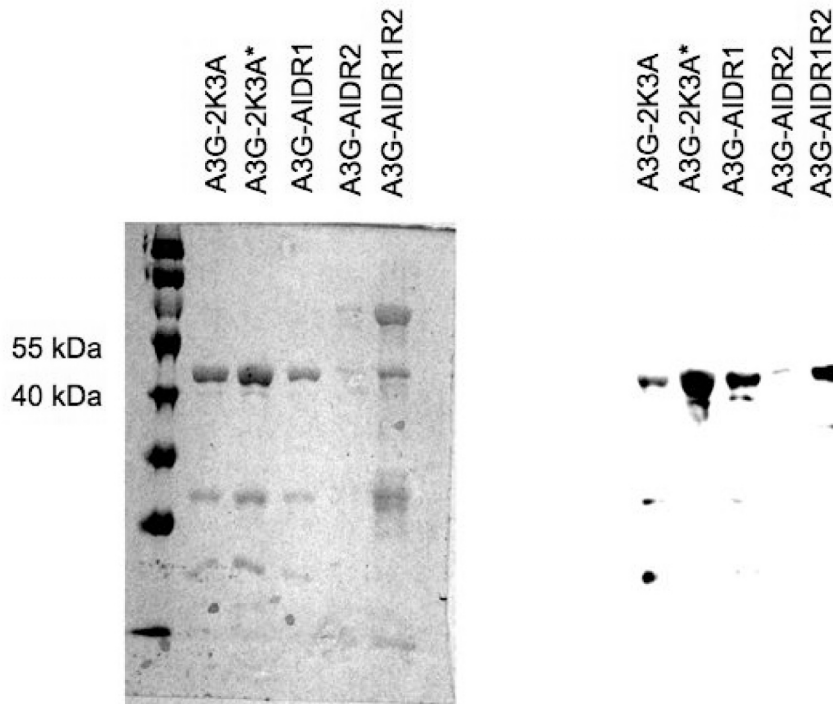

\* Protein from ion-exchange column following a glutathione affinity column

One microgram of purified APOBEC3G or its hybrids were electrophoresed in a SDS-PAGE gel, with the exception of A3GAIDR2 protein. Only 0.2  $\mu\text{g}$  of the latter protein was added because of lower concentration of protein in the preparation. This was done with two gels prepared and electrophoresed in parallel. One of the gels was stained with coomassie brilliant blue G-250 staining solution (Fisher Scientific) and the other was used for Western blot analysis. The proteins were transferred to a Immobilon-P<sup>SQ</sup> membrane (Millipore) and reacted with rabbit anti-human APOBEC3G antibody against carboxyl terminal 29 amino acids of the protein. The antibody was prepared by Dr. Jaisri Lingappa and was obtained through the NIH AIDS Research and Reference Reagent program, Division of AIDS, NIAID, NIH. HRP-linked anti-rabbit antibody was used as the secondary antibody (Pierce Chemical) and the visual signal was obtained by adding chemiluminescence substrate from Thermo Scientific and the image was captured using a CCD camera (Alpha Innotech).
